# Supplementary material for: Rapid, Highly-Efficient and Selective Removal of Anionic and Cationic Dyes from Wastewater Using Hollow Polyelectrolyte Microcapsules
Source: MDPI journal article supplement (doi:10.3390/molecules28073010), 2023-03-28
Supplement: s1 [file s1]

# Supporting Information

## **Rapid, Highly-Efficient and Selective Removal of Anionic and Cationic Dyes from Wastewater Using Hollow Polyelectrolyte Microcapsules**

**Zhiqi Zhao <sup>1</sup>, Hongbing Zhou <sup>2</sup>, Xu Han <sup>1</sup>, Lun Han <sup>1</sup>, Zhenzhen Xu <sup>1,\*</sup> and Peng Wang <sup>1,\*</sup>**

<sup>1</sup> School of Textile and Garment, Anhui Polytechnic University, Wuhu 241000, China; zhaozhiqi@mail.ahpu.edu.cn (Z.Z.); hanxu@ahpu.edu.cn (X.H.); dayanqingwashou@163.com (L.H.)

<sup>2</sup> Zhejiang Huaguang Automotive Interior Decoration Co., Ltd., Rui'an 325200, China; 13958826789@139.com

\* Correspondence: xuzhenzhen@ahpu.edu.cn (Z.X.); wangpeng@ahpu.edu.cn (P.W.)

## Figure captions

**Figure S1.** Optical images (a,b) and SEM (c,d) of the  $\text{CaCO}_3$  template.

**Figure S2.** Optical images of the P2P and P2 microcapsules.

**Figure S3.** TG-DTG spectra of  $\text{CaCO}_3$ , P2P and P2 microcapsules.

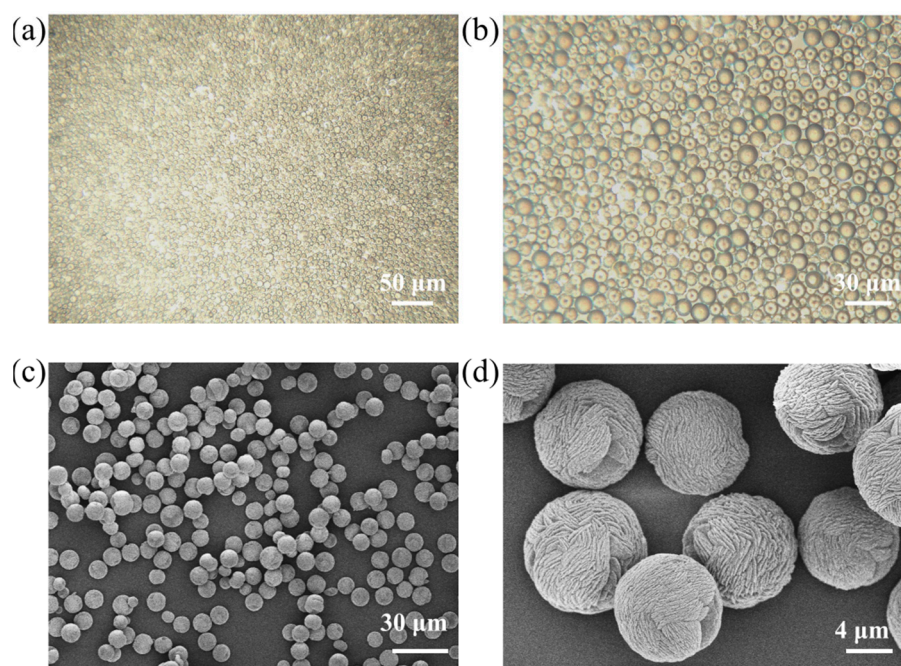

**Figure S1.**

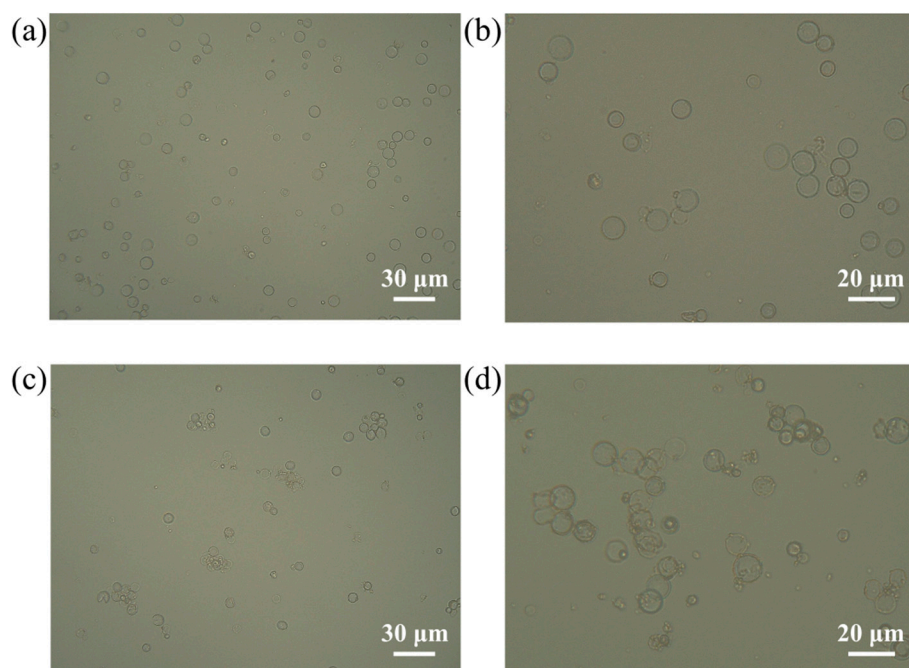

**Figure S2.**

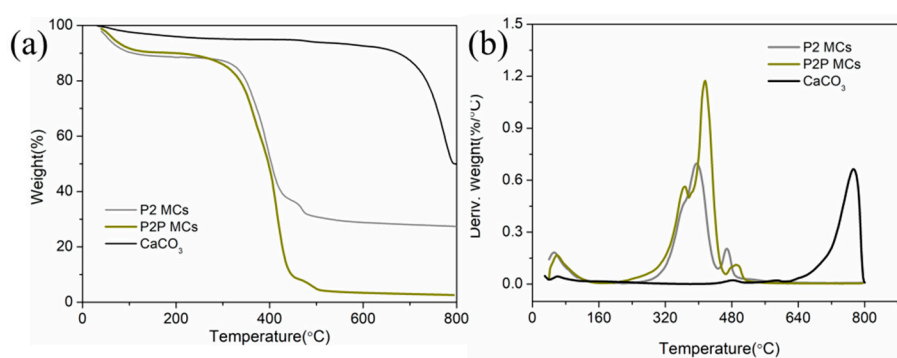

**Figure S3.**
